# Supplementary material
Source: MDPI journal article supplement (https://www.mdpi.com/search?q=ijms-25-08620)
Supplement: s001 [file ijms-25-08620-s001.zip]

Supplementary Table S1. Primer for gene expression analysis.

| Gene          | Forward primer           | Reverse primer          |
|---------------|--------------------------|-------------------------|
| <i>Agrp</i>   | GCCTCAAGAAGACAACCTGCAGAC | AAGCAGGACTCGTGCAGCCTTA  |
| <i>Atp5f1</i> | GTCCAGGGGTATTACAGGCAA    | TCAGGAATCAGCCCAAGACG    |
| <i>Cav1</i>   | CACACCAAGGAGATTGACCTGG   | CCTTCCAGATGCCGTCGAACT   |
| <i>Crtc1</i>  | CGTGAACCAGATTGGAAGCAGC   | CAAGTCTGCCACGCTCACGATA  |
| <i>Eef2</i>   | CAGAAGTACCGTTGTGAGCTGC   | GTCAGAGGTTGGCACCATCTTG  |
| <i>Fasn</i>   | CACAGTGCTCAAAGGACATGCC   | CACCAGGTGTAGTGCCTTCCTC  |
| <i>Foxo1</i>  | AGTGGATGGTGAAGAGCGTG     | TTCTCCGGGGTGATTTTCCG    |
| <i>G6pc</i>   | AGGTCGTGGCTGGAGTCTTGTC   | GTAGCAGGTAGAATCCAAGCGC  |
| <i>Gck</i>    | ACTTCAGGGTGATGCTGGTG     | GGAAGGAGAAGGTGAAGCCC    |
| <i>Ghsr</i>   | AGTCTCATCGGGAGGAAGCT     | ACAAAGGACACCAGGTTGCA    |
| <i>Gys2</i>   | CAGCACCATTAGACGAATCGGAC  | CCAAGGTGACAACCTCGGACAA  |
| <i>Insr</i>   | GATGTCCCATCAAATATTGCCAAA | CGGCACGTACACAGAAGATG    |
| <i>Irs2</i>   | CACAACCTATCGTGGCACCT     | AAGGTCTCTGAACTGTGGCG    |
| <i>Lepr</i>   | AACTGCAGTCTTCGGGGATG     | GCTGCAGTGACATCAGAGGT    |
| <i>Mc3r</i>   | GGCCACTGCAAGGTAGATGT     | GAGAACAAGGAGGCAGACCC    |
| <i>Mc4r</i>   | TATGCCCTCCGGAGTCAAGA     | ATCGGGCCAGAGTGACAAAG    |
| <i>Mest</i>   | CCGGCTCACCATAAAGAGTC     | ACGGTCCAAAGACTGGAGTG    |
| <i>Npy</i>    | TACTCCGCTCTGCGACACTACA   | GGCGTTTTCTGTGCTTTCCTTCA |
| <i>Pik3r1</i> | CAGTTTGCCCCTCCTGATGTT    | CGTGTACGTCGATCATCTCCA   |
| <i>Plin1</i>  | CTCTGGGAAGCATCGAGAAG     | GATCCACATGGCCAGAGAGT    |
| <i>Pomc</i>   | AGAGACTAGGCCTGACACGT     | CGTACTTCCGGGGGTTTTCA    |
| <i>Pparg</i>  | AAGAGCTGACCCAATGGTTG     | GCATCCTTCACAAGCATGAA    |
| <i>Rer1</i>   | GCCTTGGAATTTACCACCT      | CTTCGAATGAAGGGACGAAA    |
| <i>Rpl13a</i> | AGCCTACCAGAAAGTTTGCTTAC  | GCTTCTTCTTCCGATAGTGCATC |
| <i>Slc2a2</i> | GTTGGAAGAGGAAGTCAGGGCA   | ATCACGGAGACCTTCTGCTCAG  |
| <i>Slc2a4</i> | GGTGTGGTCAATACGGTCTTCAC  | AGCAGAGCCACGGTCATCAAGA  |
| <i>Socs3</i>  | CACACAAGGAGCCAAACACA     | TAGCCACCTGGGTGAATCC     |
| <i>Srebf1</i> | CGACTACATCCGCTTCTTGCA    | CCTCCATAGACACATCTGTGCC  |
| <i>Stat3</i>  | GTTCTGGCACCTTGGATT       | CAACGTGGCATGTGACTCTT    |
